# Supplementary material for: Direct spun aligned carbon nanotube web-reinforced proton exchange membranes for fuel cells
Source: Royal Society of Chemistry journal article supplement (doi:10.1039/c4ra03117b), 2014-01-01
Supplement: c4ra03117b1.pdf [file c4ra03117b1.pdf]

Electronic Supplementary Information (ESI)

## Direct Spun Aligned Carbon Nanotube Web-Reinforced Proton Exchange Membranes for Fuel Cells

Jonghyun Choi,<sup>a</sup> Chanmin Lee,<sup>b,c</sup> Stephen C. Hawkins,<sup>d</sup> Chi P. Huynh,<sup>a,c</sup> Jeongho Park,<sup>b</sup> Yukwon Jeon,<sup>f</sup> Yen B. Truong,<sup>a</sup> Ilias L. Kyratzis,<sup>a</sup> Yong-Gun Shul<sup>\*,b,f</sup> and Rachel A. Caruso<sup>\*,a,g</sup>

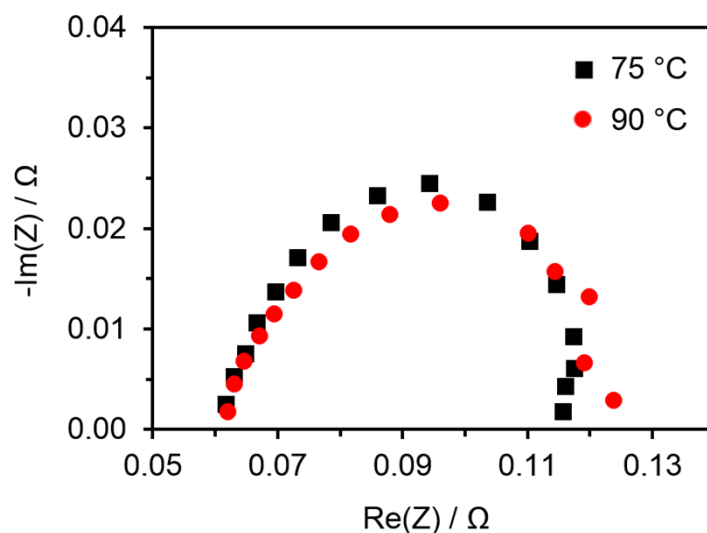

Figure S1. Nyquist plot of SPEEK/dsCNT membrane at 75 °C and 90 °C and 100% RH. The membrane resistance was 0.062 Ω (at 75 °C) and 0.062 Ω (at 90 °C), and interface resistance was 0.054 Ω (at 75 °C) and 0.062 Ω (at 90 °C).

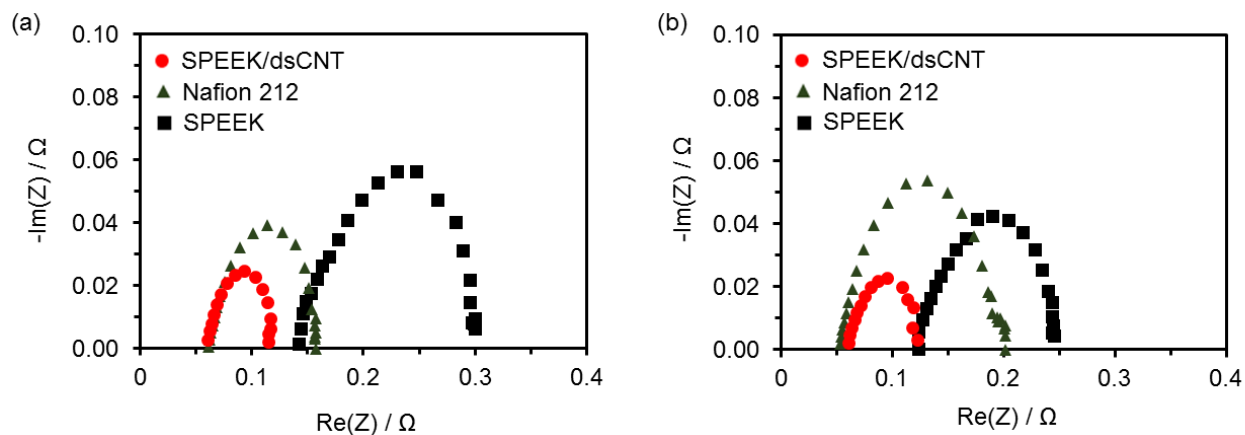

Figure S2. Nyquist plots of SPEEK/dsCNT, Nafion 212 and SPEEK membranes at 100% RH and (a) 75 °C or (b) 90 °C.

Table S1. Comparison of membrane resistance and interface resistance for SPEEK/dsCNT and Nafion 212 membranes.

| Resistance                                | SPEEK/dsCNT    | Nafion 212     |
|-------------------------------------------|----------------|----------------|
| Membrane resistance at 75 °C and 100% RH  | 0.062 $\Omega$ | 0.061 $\Omega$ |
| Membrane resistance at 90 °C and 100% RH  | 0.062 $\Omega$ | 0.053 $\Omega$ |
| Interface resistance at 75 °C and 100% RH | 0.054 $\Omega$ | 0.096 $\Omega$ |
| Interface resistance at 90 °C and 100% RH | 0.062 $\Omega$ | 0.148 $\Omega$ |
